# Supplementary material
Source: PubMed Central journal article supplement (PMC5653967)
Supplement: NIHMS910605-supplement-supplement.pdf [file NIHMS910605-supplement-supplement.pdf]

Figure S1

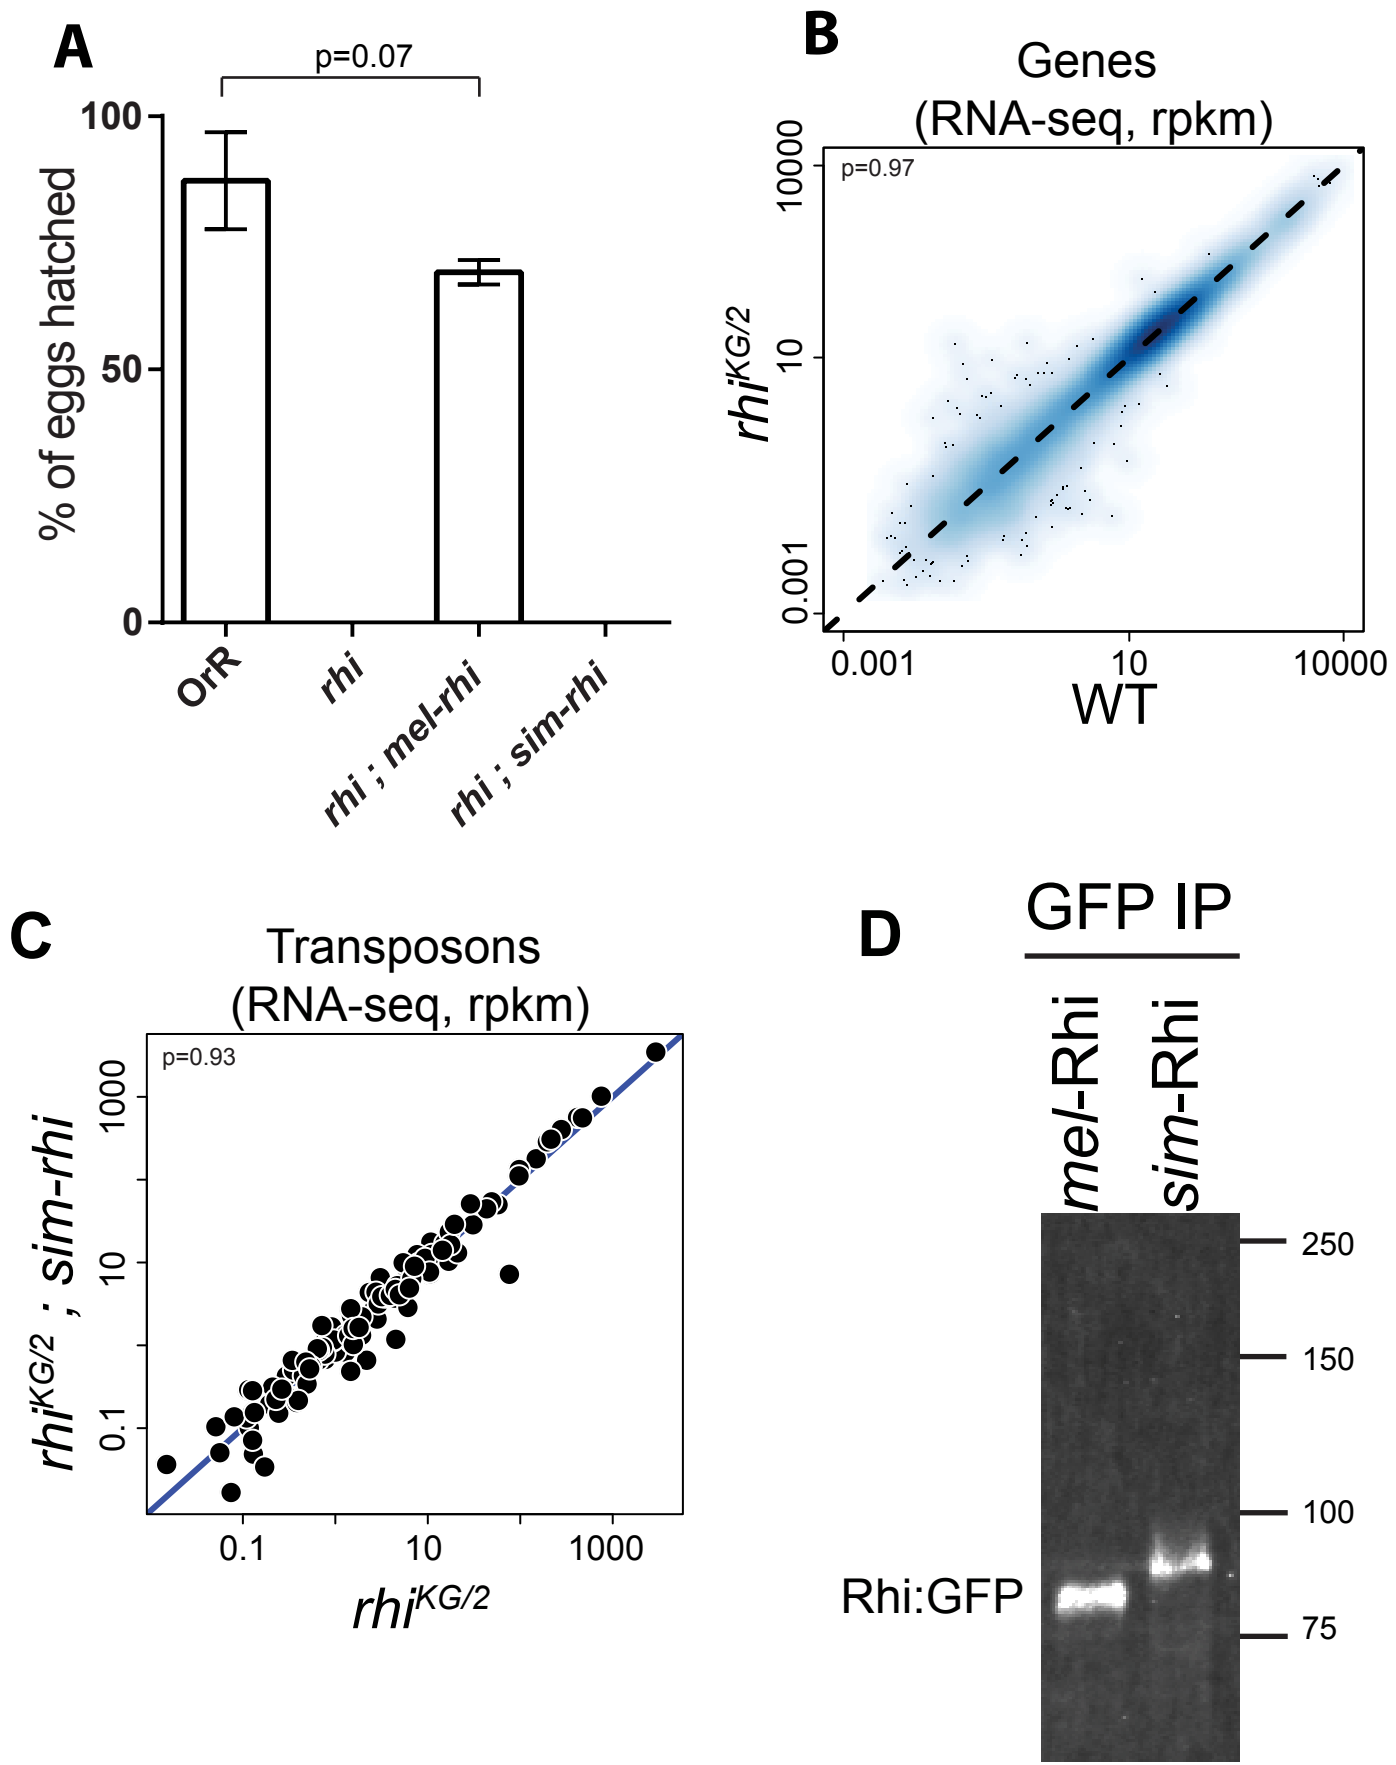

Figure S2

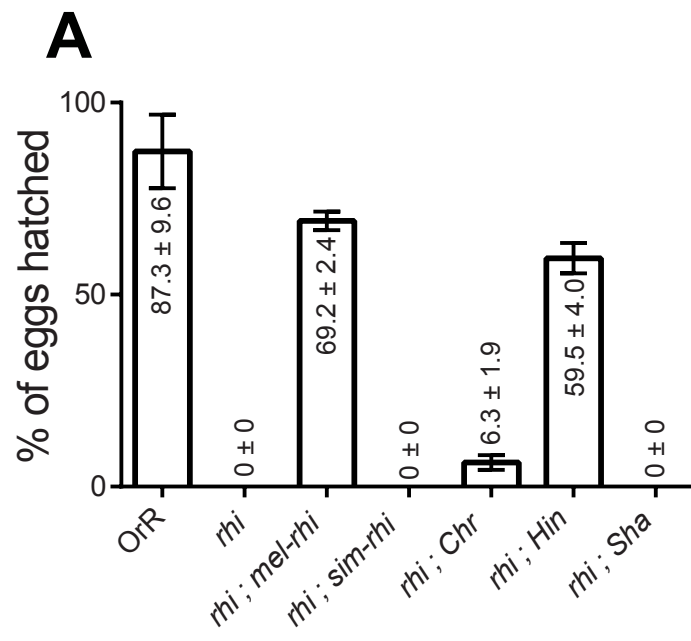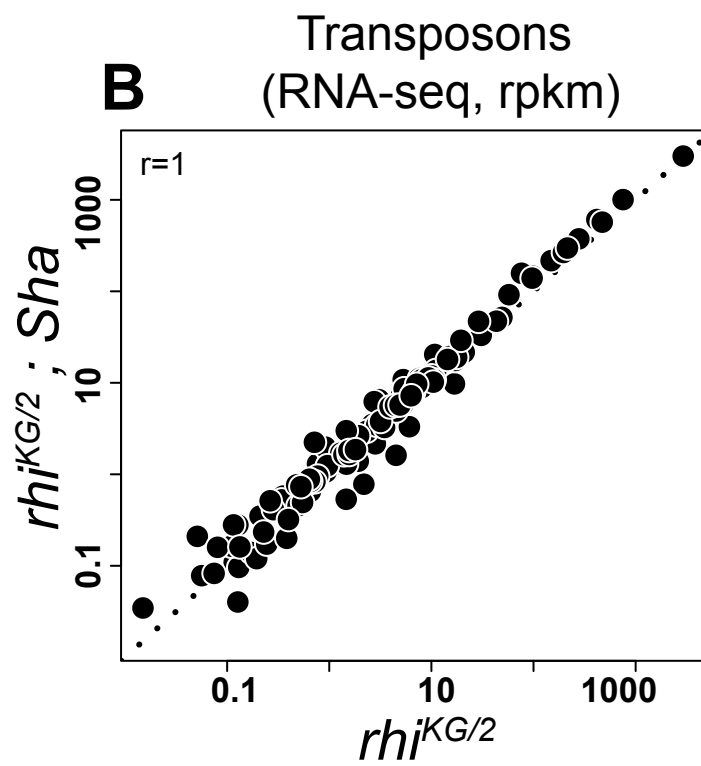

Figure S3

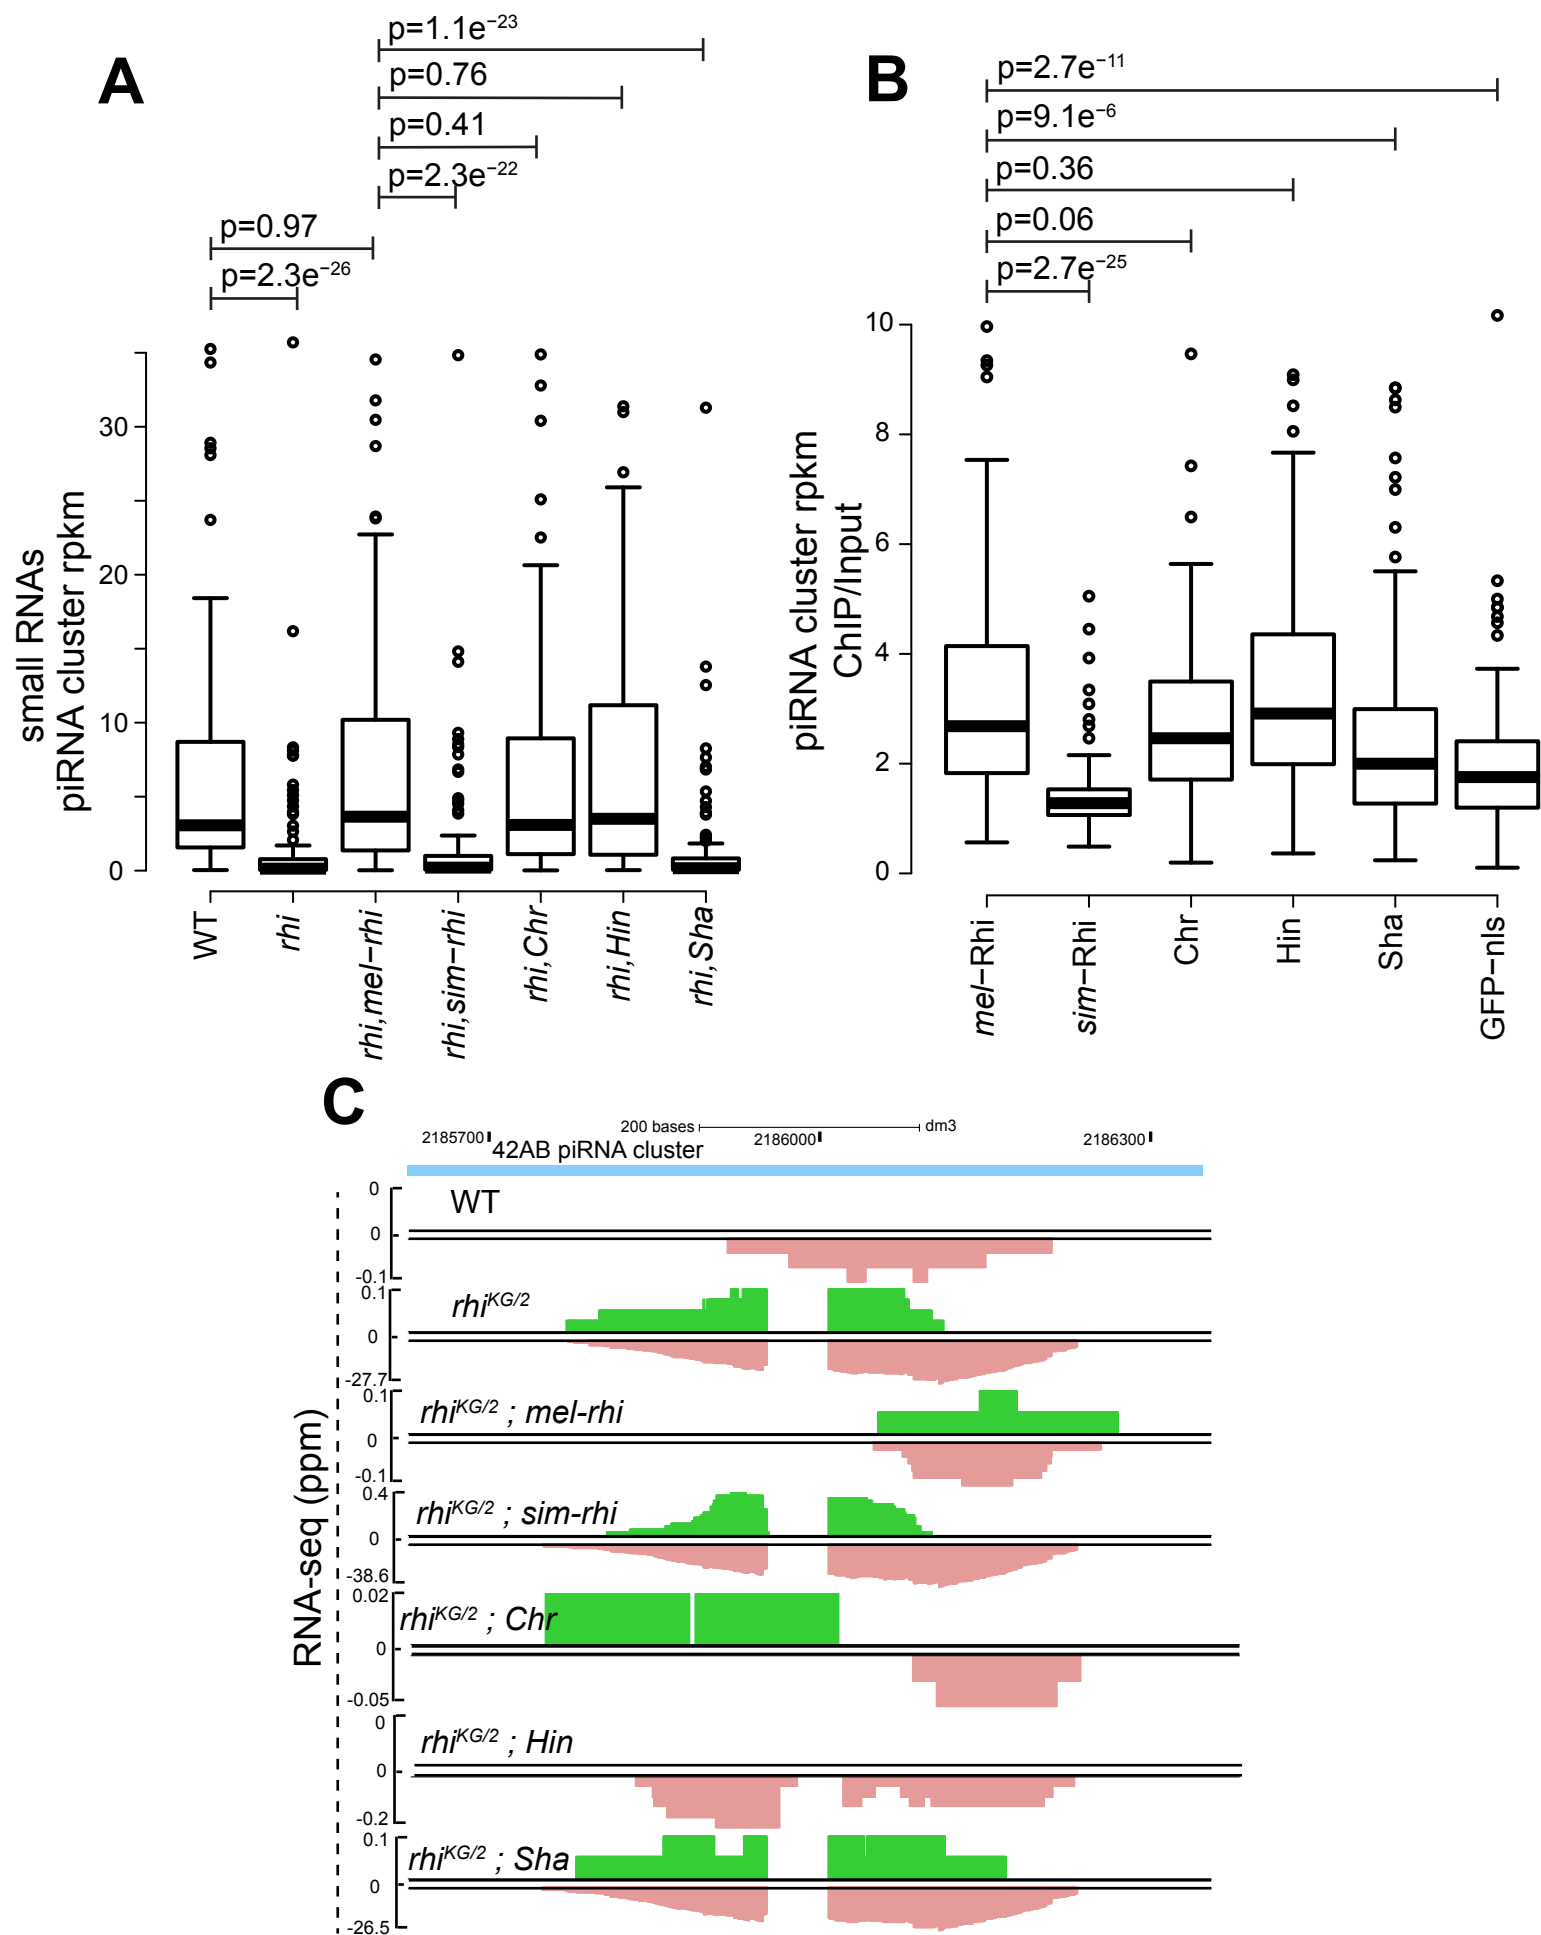

Figure S4

**A** *nosG* > GFP-Rhi

| Bait protein    | Spectrum counts |     |          |
|-----------------|-----------------|-----|----------|
|                 | GFP             | Rhi | Deadlock |
| <i>mel</i> -Rhi | 60              | 79  | 24       |
| <i>sim</i> -Rhi | 75              | 73  | 0        |
| GFP ctrl        | 187             | 0   | 0        |
| Chromo          | 74              | 87  | 23       |
| Hinge           | 83              | 89  | 26       |
| Shadow          | 48              | 67  | 0        |

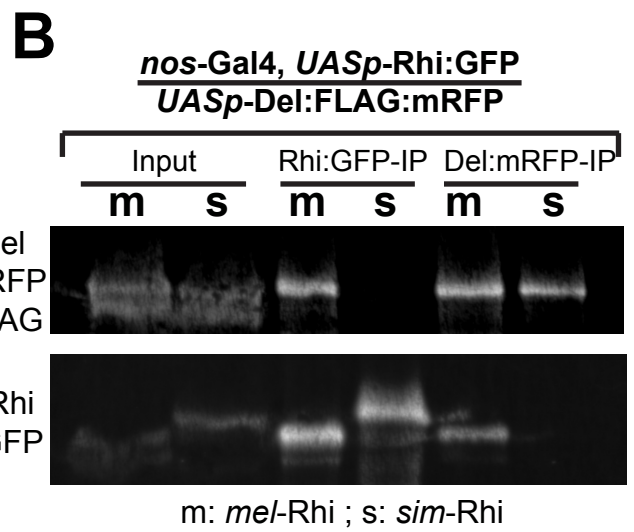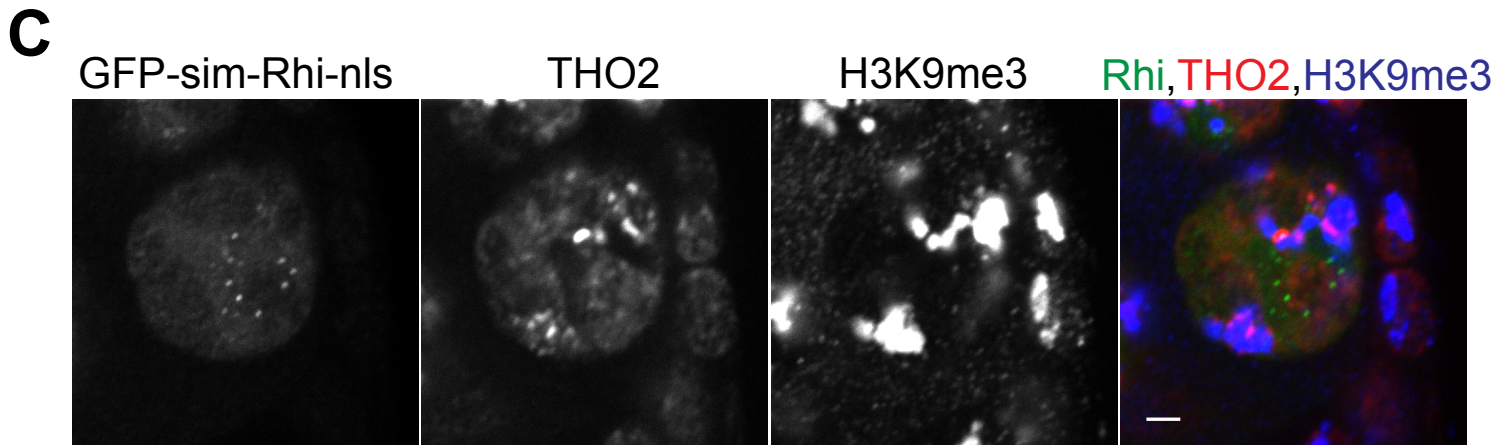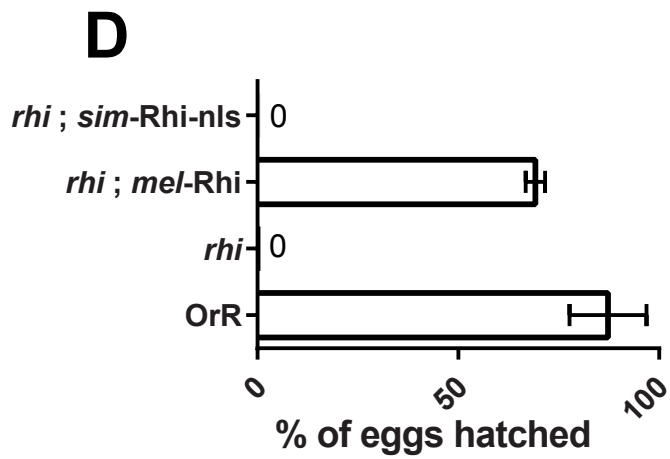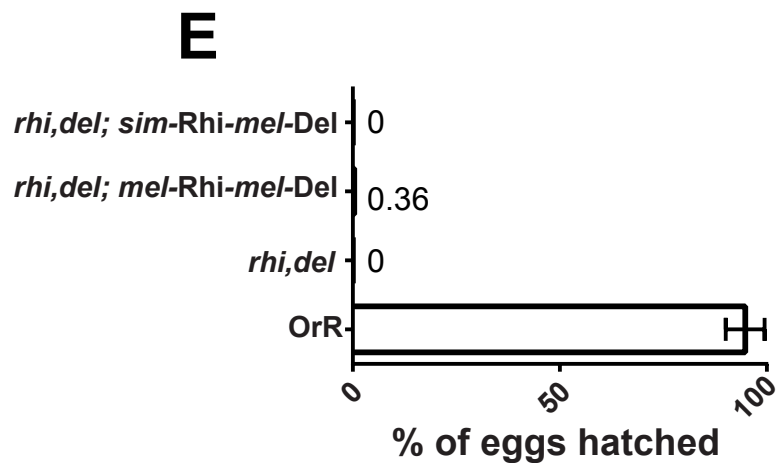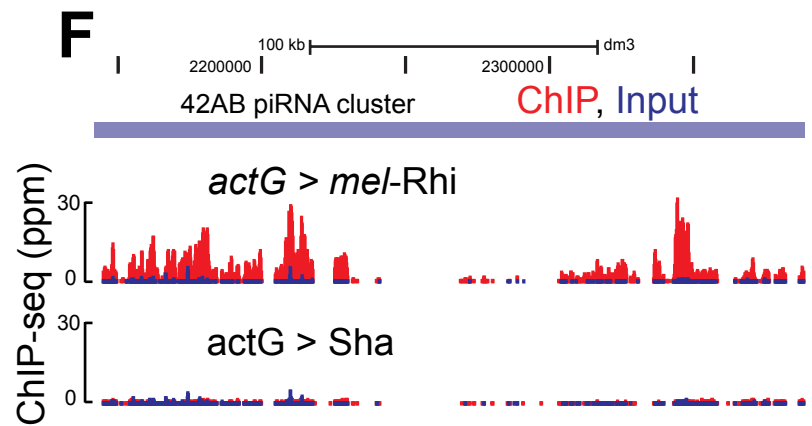



Figure S5

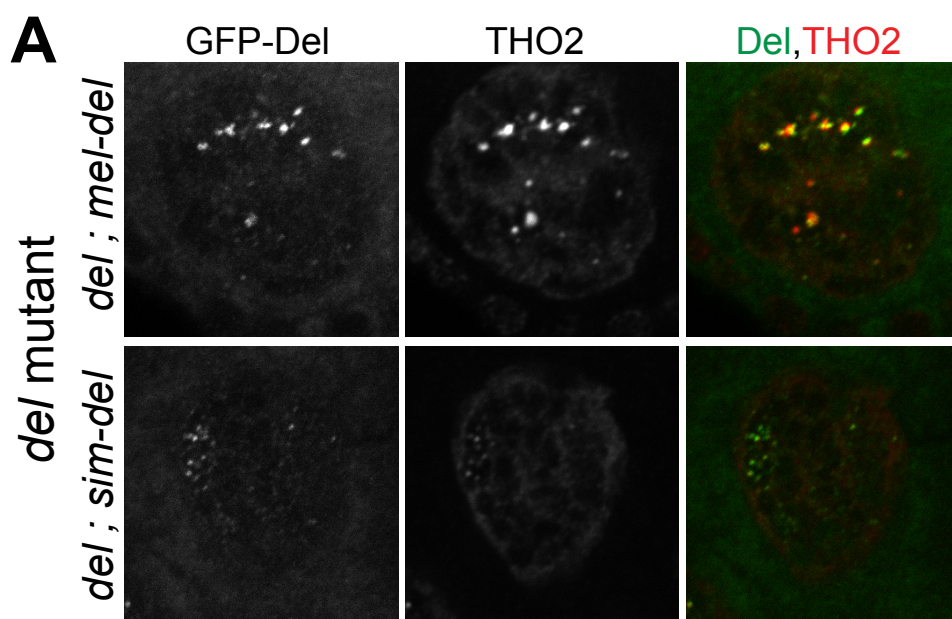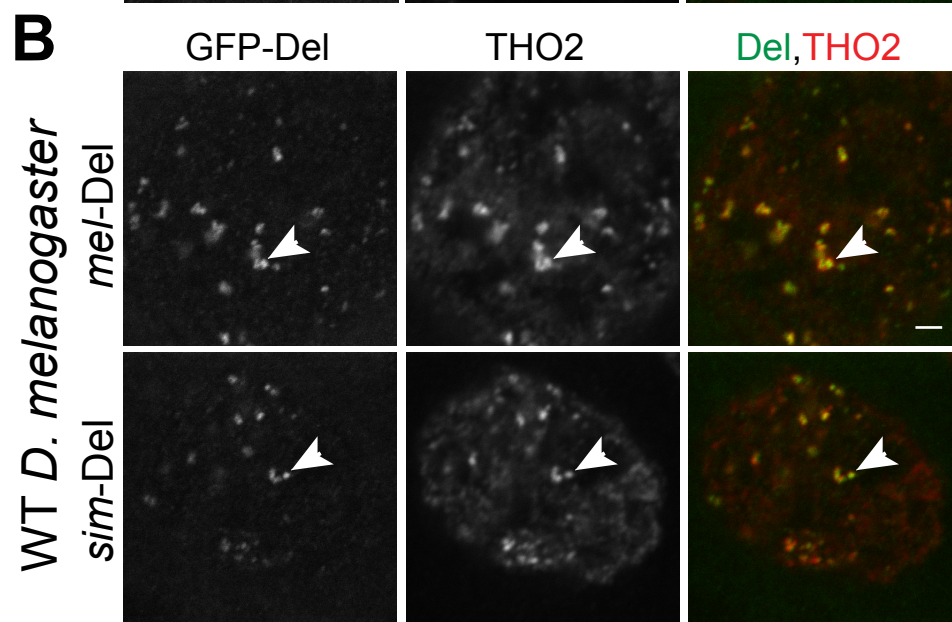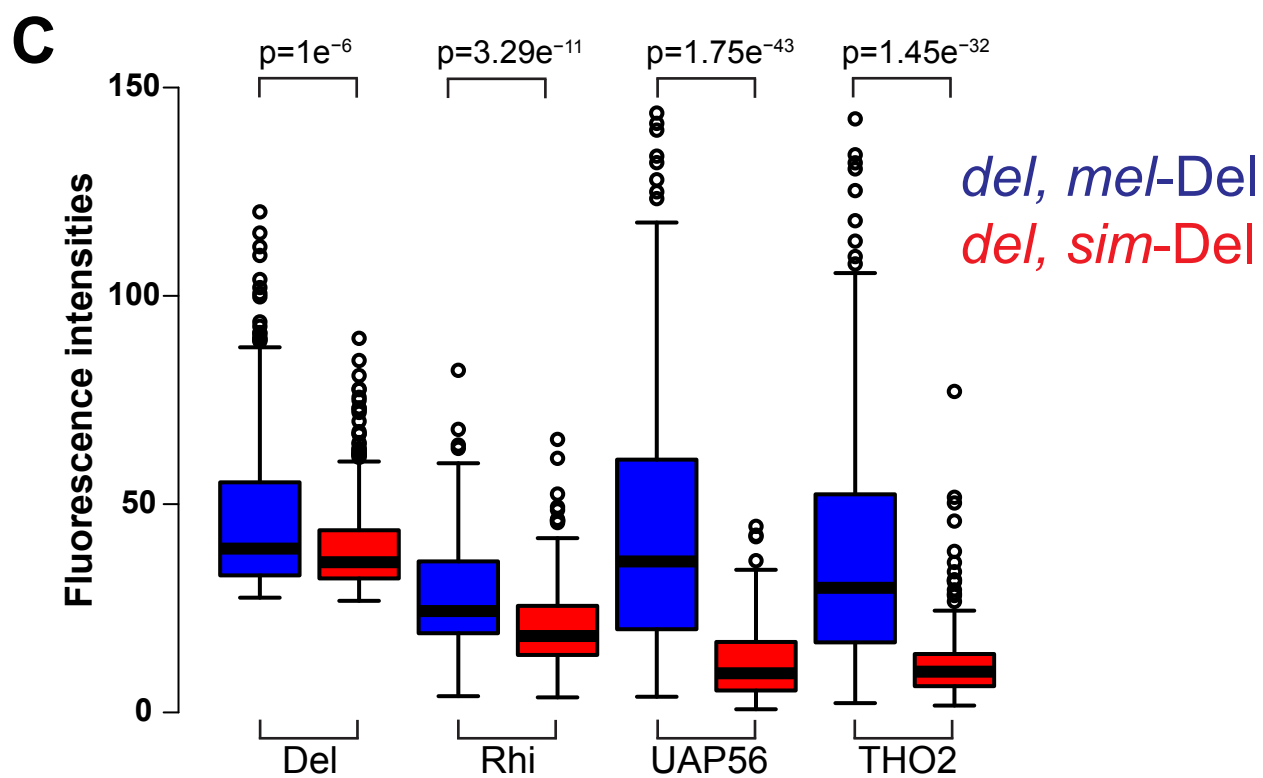

Figure S6

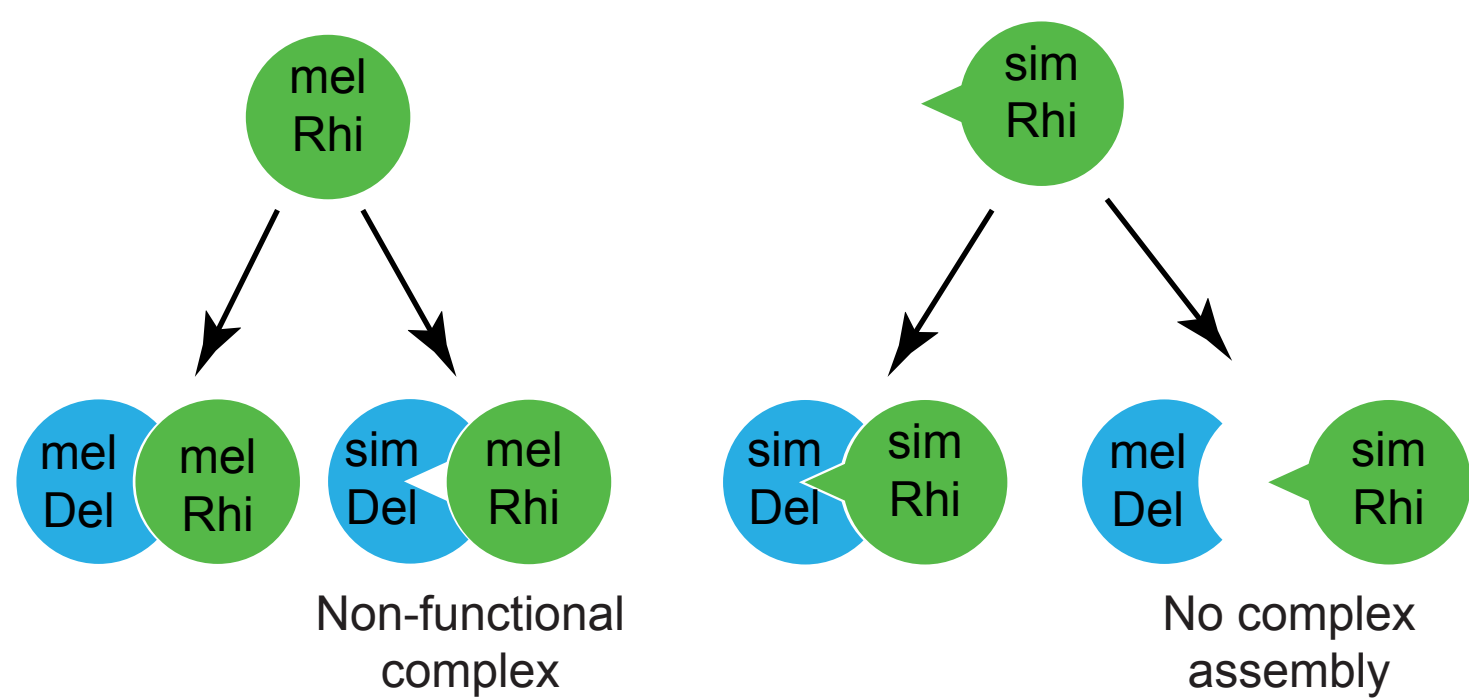

**Figure S1. Related to Figure 1. *sim-rhi* behaves like a null *rhi* allele in *melanogaster***

(A) Bar graphs showing percentages of hatched eggs from females of genotypes: OrR (WT control), *rhi* mutant, and *rhi* mutants expressing either *mel-rhi* or *sim-rhi*. The numbers in/above the bars show mean  $\pm$  standard deviation of three biological replicates, with a minimum of 500 embryos scored per replicate, except for *rhi* mutants and *rhi* mutants rescued by *sim-rhi* where average of at least 30 eggs were scored.

(B) Scatterplots showing gene expression levels measured by RNA-seq in ovaries of *rhi* mutant vs. WT control. Each point represents rpkm value for a different gene. Diagonal represents  $x=y$ . p value for differences is obtained by Wilcoxon test.

(C) Scatterplots showing transposon expression levels measured by RNA-seq in ovaries of *rhi* mutant vs. *rhi* mutant expressing *sim-rhi*. Diagonal represents  $x=y$ . p value for differences is obtained by Wilcoxon test.

(D) Western blot showing *mel-Rhi* and *sim-Rhi* IPed from *melanogaster* ovaries by the GFP tag.

**Figure S2. Related to Figure 2. Shadow chimera transgene behaves like a null *rhi* allele in *melanogaster***

(A) Bar graphs showing percentages of hatched eggs from females of genotypes: OrR (WT control), *rhi* mutant, and *rhi* mutants expressing either *mel-rhi* or *sim-rhi* or different chimeras. The numbers in/above the bars show mean  $\pm$  standard deviation of three biological replicates, with a minimum of 500 embryos scored per replicate, except for *rhi* mutants and *rhi* mutants rescued by *sim-rhi* or Shadow chimera where average of at least 30 eggs were scored.

(B) Scatterplots showing transposon expression levels measured by RNA-seq in ovaries of *rhi* mutant vs. *rhi* mutant expressing shadow chimera. Diagonal represents  $x=y$ . p value for differences is obtained by Wilcoxon test.

**Figure S3. Related to Figure 3. piRNA, CHIP-seq and RNA-seq splicing profiles for different Rhi variants**

(A) Boxplot showing piRNA cluster rpkm values for small RNAs, in genotypes: WT, *rhi* mutant, and *rhi* mutants expressing either *mel-rhi* or *sim-rhi* or different chimeras. p value for differences is obtained by Wilcoxon test.

(B) Boxplot showing piRNA cluster rpkm ratios for CHIP signal to input signal, for *mel-Rhi*, *sim-Rhi*, chimeras or GFP-nls control. p value for differences is obtained by Wilcoxon test.

(C) Genome browser view of RNA-seq profiles at 42AB cluster in WT, *rhi* mutant and *rhi* mutants rescued by *mel-Rhi*, *sim-Rhi* or different chimeras. Green: Watson strand, pink: Crick strand. The scales are adjusted to prevent peak clipping.

**Figure S4. Related to Figure 4. *sim-Rhi* does not bind to *mel-Del***

(A) Total spectrum counts corresponding to GFP, Rhino and Deadlock that co-precipitated with the indicated tagged proteins and GFP control. The *sim-Rhi* and shadow chimera fail to bind to *melanogaster* Del.

(B) Western blot showing that *sim-Rhi* does not bind to *mel-Del*, observed by reciprocal IP of Rhi:GFP and Del:FLAG:mRFP. m: *mel-Rhi*:GFP, s: *sim-Rhi*:GFP. Probing was done by anti-GFP (for Rhi:GFP) and anti-FLAG (for Del:FLAG:mRFP) antibodies.

(C) Localization of THO2 (piRNA cluster marker), H3K9me3 marked chromatin in the germline nuclei expressing *Act5C*-Gal4 driven GFP tagged *sim*-Rhi-nls. Color assignments for merged image shown on top. Scale bar: 2 $\mu$ m.

(D) Bar graphs showing percentages of hatched eggs from females of genotypes: OrR (WT control), *rhi* mutant, and *rhi* mutants expressing either *mel*-Rhi or *sim*-Rhi-nls. The numbers in/above the bars show mean  $\pm$  standard deviation of three biological replicates, with a minimum of 500 embryos scored per replicate, except for *rhi* mutants and *rhi* mutants rescued by *sim*-Rhi-nls where average of at least 30 eggs were scored.

(E) Bar graphs showing percentages of hatched eggs from females of genotypes: OrR (WT control), *rhi,del* double mutant, and *rhi,del* double mutants expressing Rhi-Del fusions. The numbers in/above the bars show mean  $\pm$  standard deviation of three or more biological replicates, with a minimum of 40 embryos scored per replicate.

(F) Genome browser view of ChIP-seq profiles at 42AB cluster for *act5C*-Gal4 driven GFP tagged *mel*-Rhi and shadow chimera. Both ChIP done under identical conditions, using the same anti-GFP antibody. ChIP signal in red, input signal in blue.

**Figure S5. Related to Figure 6. *sim*-Del fails to recruit components of piRNA pathway**

(A) Localization of THO2 in *del* mutants expressing either *mel*-Del or *sim*-Del.

(B) Localization of GFP tagged *mel*-Del and *sim*-Del in WT *melanogaster* female germline nuclei. Egg chambers were double labeled for THO2 (piRNA cluster marker). Both forms of Del co-localize to nuclear foci with THO2. Scale bar: 2 $\mu$ m.

(C) Boxplot showing fluorescence intensities of Del:GFP, Rhi, UAP56 and THO2 foci in *del* mutants expressing *mel*-Del (blue) or *sim*-Del (red).

**Figure S6. Related to Figure 7. Model for directional binding incompatibility in Rhi-Del**

*mel*-Rhi can bind to Del from both the species, but *sim*-Rhi can bind to *sim*-Del, but is incompatible with *mel*-Del. Significantly, our data indicate that the *mel*-Rhi/*sim*-Del complex is not functional.
